# Supplementary material for: Degradation of Orange G Using PMS Triggered by NH2-MIL-101(Fe): An Amino-Functionalized Metal–Organic Framework
Source: MDPI journal article supplement (doi:10.3390/molecules29071488), 2024-03-27
Supplement: s1 [file s1]

## Supporting Information

### LC-MS detection information

Liquid phase conditions:

Instrumentation: waters HClass

mobile phase: 90 per cent acetonitrile (with 0.1 per cent formic acid)

column temperature: 40°C

flow rate: 0.6mL/min

Mass Spectrometry Conditions:

Instrumentation: waters G2-XS Qtof

Positive mode: Voltage 3.5kv

Ion source temperature 110°C

Desolventisation temperature 400°C

Nitrogen flow rate 800L/h

Negative mode: Voltage 3kv

Ion source temperature 110°C

Desolventisation temperature 400°C

Nitrogen flow rate 800L/h

Table S1: Possible intermediates of OG

| NO. | Chemical structure                                                                  | Molecular formula           | m/z   |
|-----|-------------------------------------------------------------------------------------|-----------------------------|-------|
| 1   | 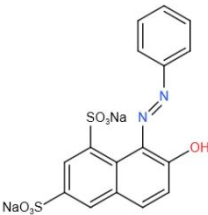   | $C_{16}H_{10}N_2Na_2O_7S_2$ | 452   |
| 2   |    | $C_{16}H_{12}N_2O_5S$       | 344   |
| 3   |    | $C_{16}H_{12}ON_2$          | 248   |
| 4   |   | $C_{10}H_{10}O_7N_2S$       | 302   |
| 5   |  | $C_{10}H_7N_2NaO_5S$        | 290.8 |
| 6   |  | $C_{10}H_8O_7S_2$           | 304   |
| 7   |  | $C_{10}H_8O_4S$             | 224   |
| 8   |  | $C_9H_8O_5$                 | 196   |

|    |                                                                                     |                    |     |
|----|-------------------------------------------------------------------------------------|--------------------|-----|
| 9  | 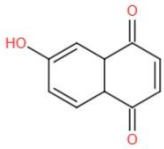   | $C_{10}H_6O_3$     | 174 |
| 10 |    | $C_7H_6O_2$        | 122 |
| 11 |    | $C_{10}H_7O_7NS_2$ | 340 |
| 12 |    | $C_{10}H_9O_2N$    | 175 |
| 13 |  | $C_6H_6O$          | 109 |
| 14 |  | $C_6H_6O_2$        | 110 |

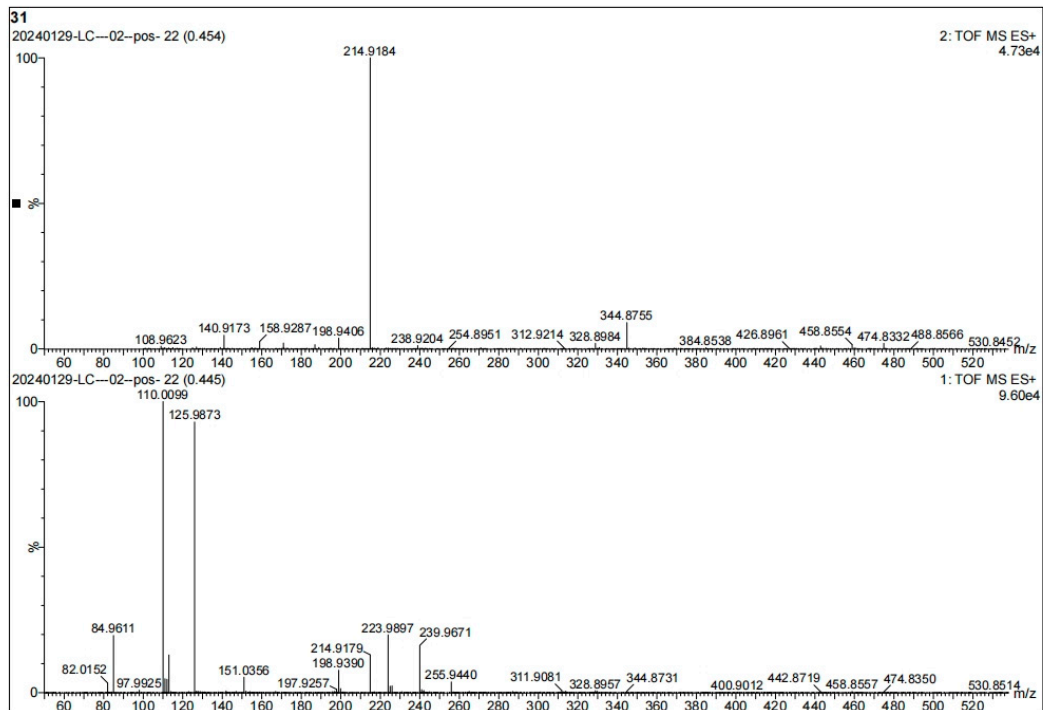

(a)

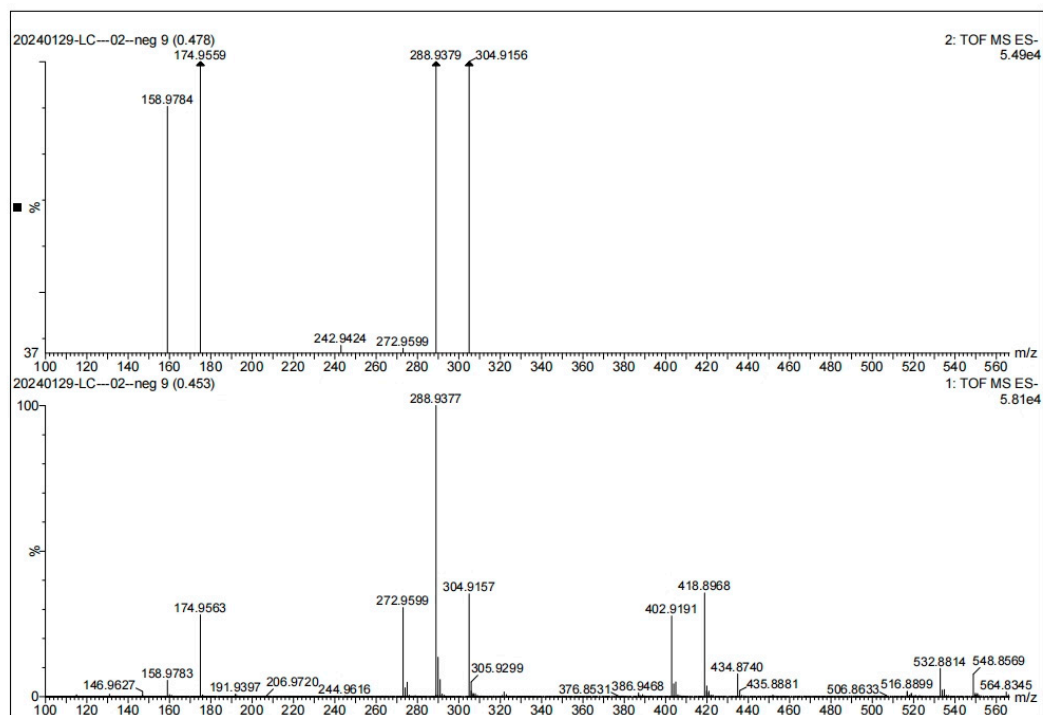

(b)

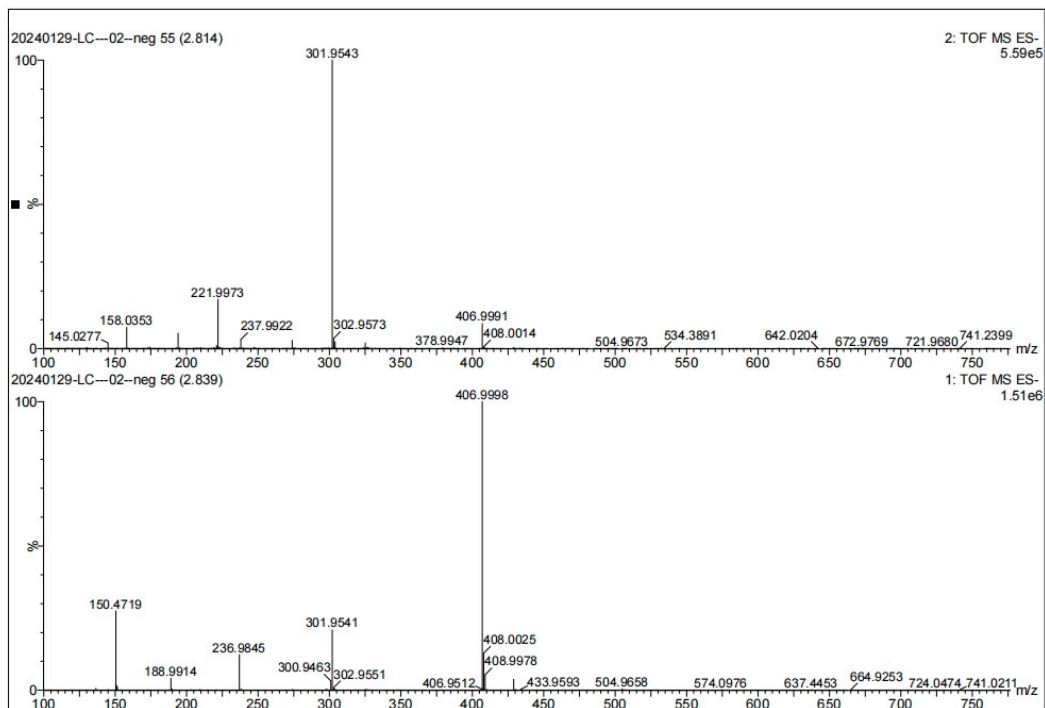

(c)

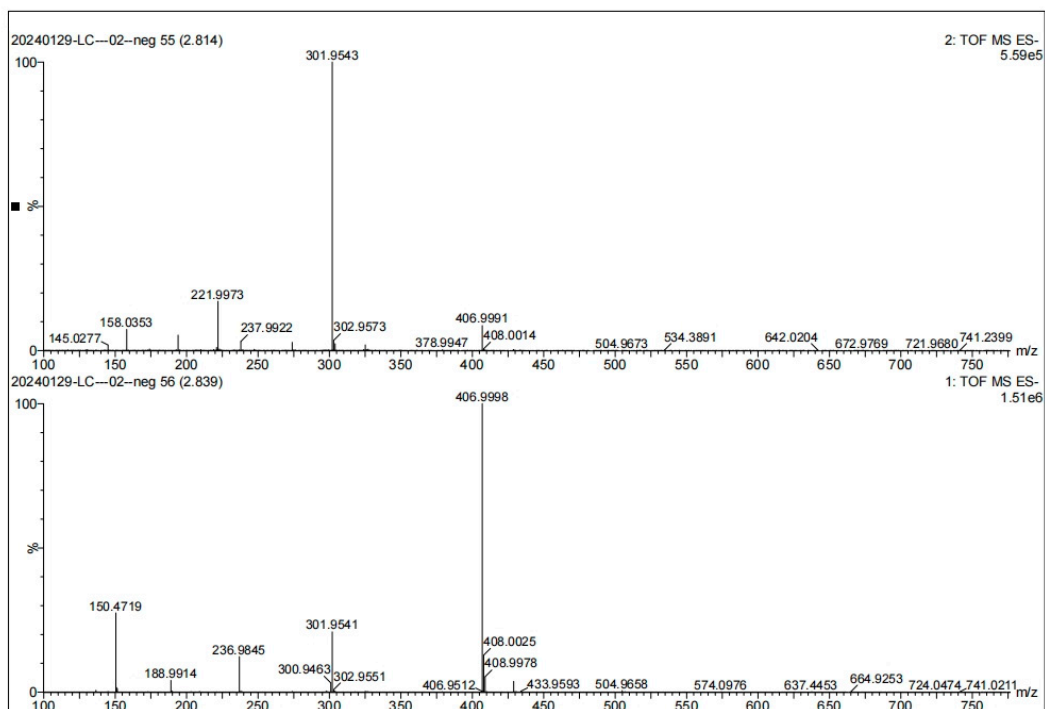

(d)



(e)

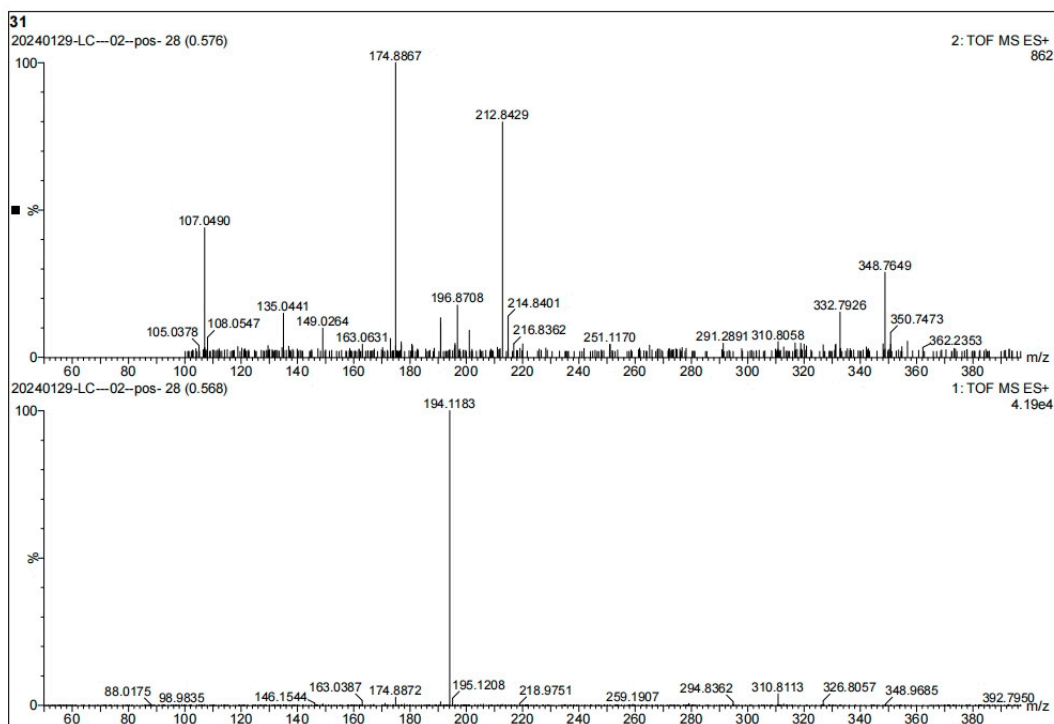

(f)

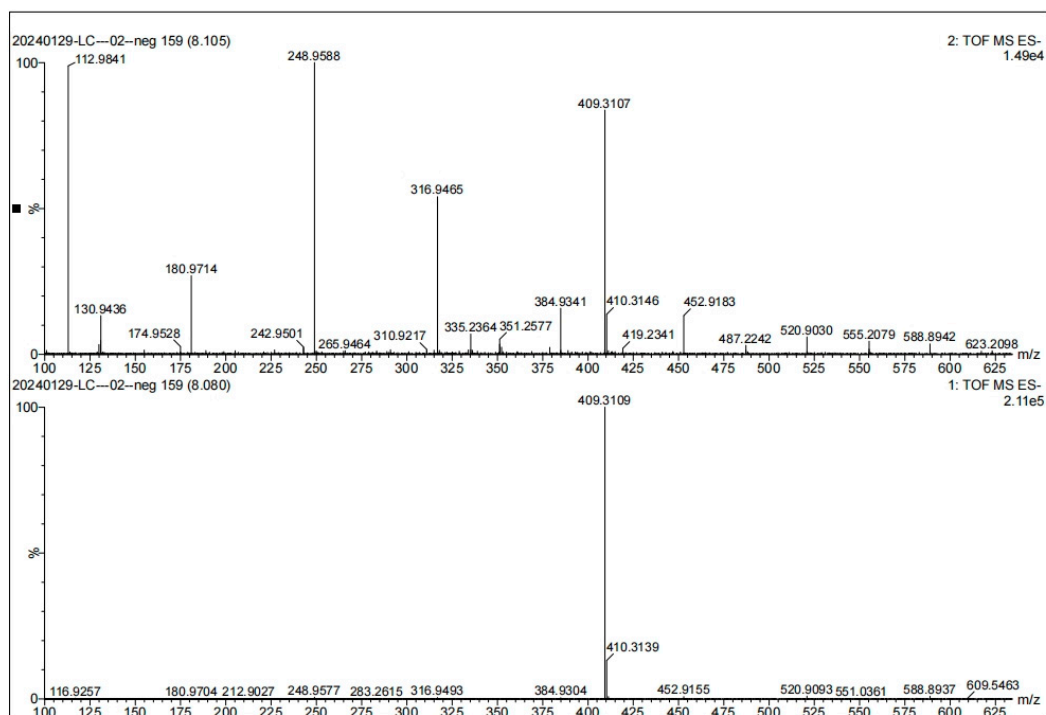

(g)

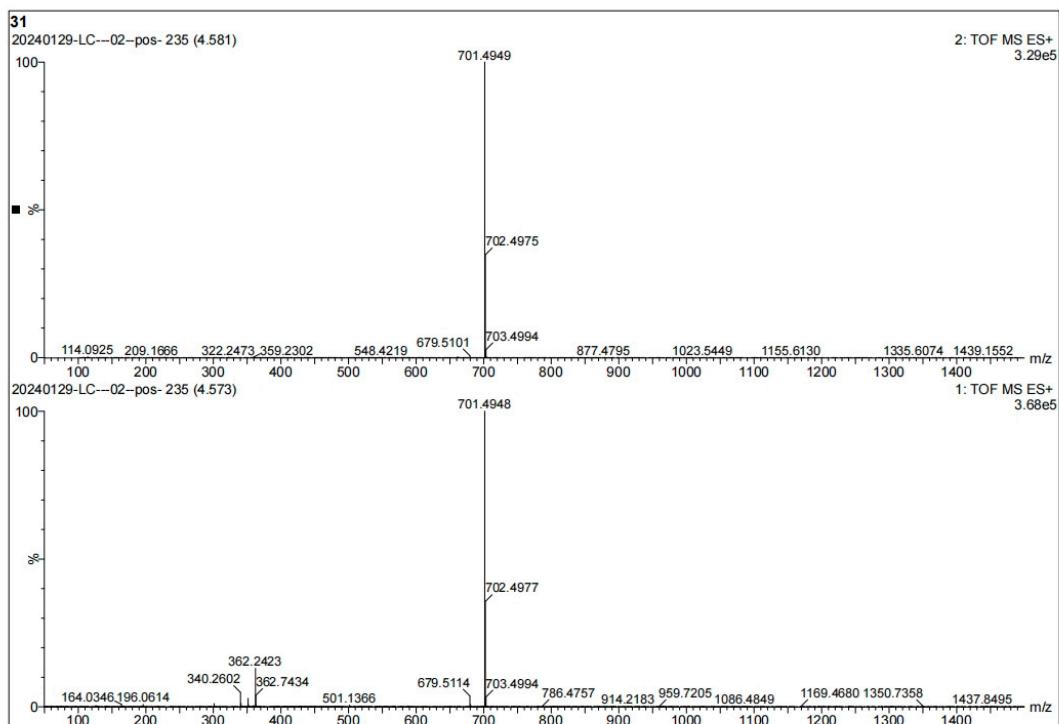

(h)

Figure S1: Secondary mass spectra of possible intermediates of OG(a-h)
